# Supplementary material for: NDRG1 Expression Is an Independent Prognostic Factor in Inflammatory Breast Cancer
Source: Cancers (Basel). 2020 Dec 10;12(12):3711. doi: 10.3390/cancers12123711 (PMC7763268; doi:10.3390/cancers12123711)
Supplement: Supplementary file 1 [file cancers-12-03711-s001.xlsx]

## Sheet: Analysis
#	NDRG1 (%)	NDRG1 (intensity 1,2,3)	NDRG1 H-score	NDRG1 status	Age	Race	Histological type	Grade	Lymphovascular invasion	Stage	ER staus	PR status	HER2 status	TNBC status	Adjuvant radiation	Survial status	OS (event)	DSS (event)	Survival (Years)	Sex
1	70	2	140	High	31	White	Lobular	III	Yes	IIIB	1	0	2	0	Yes	Dead/WD	1	1	3.46575	F		ER, PR, HER2: 0=negative, 1=positive, 2=NA
2	50	2	100	Low	44	White	Lobular	II	Yes	IIIB	0	0	1	0	Yes	Alive/NED	0	0	16.1671	F
3	90	2	180	High	50	White	Ductal	III	No	IIIB	2	2	0		Yes	Dead/WD	1	1	6.13973	F		WD=with disease; NED=no evidence of disease; NOS=not otherwise specified
4	30	1	30	Low	50	Spanish,Hispanic	Ductal	III	Yes	IIIB	0	0	0	1	Yes	Alive/NED	0	0	17.5479	F
5	80	2	160	High	61	White	Lobular	II	Yes	IIIB	1	1	0	0	No	Dead/WD	1	1	0	F
6	80	2	160	High	51	White	Ductal	III	Yes	IIIB	0	0	0	1	Yes	Dead/WD	1	1	3.09863	F
7	80	2	160	High	54	White	Ductal	III	Yes	IIIB	0	0	0	1	Yes	Dead/WD	1	1	3.71507	F
9	90	3	270	High	70	White	Ductal	III	Yes	IIIB	1	0	1	0	Yes	Dead/NED	1	0	3.74795	F
10	0	0	0	Low	47	Spanish,Hispanic	Ductal	III	Yes	IIIB	0	0	0	1	No	Dead/WD	1	1	5.90685	F
14	90	3	270	High	49	White	Ductal	I	Yes	IIIB	0	0	1	0	No	Dead/WD	1	1	4.5863	F
15	90	3	270	High	63	White	Ductal	III	Yes	IIIB	1	0	0	0	No	Dead/WD	1	1	9.52603	F
16	80	3	240	High	33	White	Ductal	I	Yes	IIIC	0	0	1	0	Yes	Dead/WD	1	1	4.34247	F
17	80	2	160	High	54	White	Ductal	II	Unknown	IIIB	1	0	1	0	Yes	Dead/WD	1	1	2.40822	F
19	80	3	240	High	45	White	Ductal	III	Yes	IIIB	0	1	1	0	No	Dead/WD	1	1	1.15342	F
21	60	1	60	Low	48	White	Ductal	III	No	IIIB	0	0	0	1	No	Dead/WD	1	1	1.98904	F
22	70	3	210	High	58	White	Ductal	III	Yes	IIIB	0	0	0	1	Yes	Dead/WD	1	1	1.58082	F
23	50	1	50	Low	46	Asian/Pacific IS	Ductal	III	No	IIIC	1	1	1	0	Yes	Alive/NED	0	0	15.589	F
26	0	0	0	Low	57	White	Ductal	III	Yes	IIIC	1	1	0	0	Yes	Alive/NED	0	0	15.1781	F
28	30	3	90	Low	54	White	Ductal	III	Unknown	IIIB	0	1	1	0	Yes	Dead/WD	1	1	3.22466	F
32	100	3	300	High	54	White	Ductal	III	Yes	IIIC	0	0	0	1	Yes	Dead/WD	1	1	10.1781	F
33	50	1	50	Low	32	Spanish,Hispanic	Ductal	III	Yes	IIIB	1	0	1	0	Yes	Alive/WD	0	0	1.73151	F
34	80	2	160	High	58	White	Ductal	III	No	IV	1	1	0	0	Yes	Dead/WD	1	1	2.47671	F
37	80	2	160	High	33	Spanish,Hispanic	Ductal	III	Yes	IIIC	0	0	0	1	Yes	Dead/WD	1	1	1.0411	F
38	60	3	180	High	48	White	Ductal	III	Yes	IIIB	1	1	1	0	No	Alive/NED	0	0	13.5808	F
42	70	2	140	High	64	White	Ductal	III	Yes	IV	0	0	1	0	No	Dead/WD	1	1	1.06575	F
43	60	3	180	High	33	Other	Ductal	III	Yes	IIIB	0	0	0	1	Yes	Alive/WD	0	0	1.99726	F
45	80	1	80	Low	39	Black	Ductal	III	Yes	IIIB	0	0	1	0	Yes	Alive/NED	0	0	13.5644	F
46	80	1	80	Low	48	White	Ductal	III	Yes	III	0	0	1	0	No	Dead/NOS	1		1.07945	F
47	30	1	30	Low	42	Black	Ductal	III	Yes	IIIB	0	0	1	0	Yes	Alive/NED	0	0	12.8877	F
49	30	1	30	Low	64	White	Ductal	III	Yes	IIIB	0	0	1	0	Yes	Dead/WD	1	1	2.44932	F
51	30	2	60	Low	62	White	Ductal	III	Yes	IIIB	0	0	1	0	Yes	Dead/WD	1	1	10.6877	F
52	0	0	0	Low	73	White	Ductal	III	Yes	IIIB	1	1	0	0	No	Dead/WD	1	1	4.91233	F
53	100	2	200	High	46	White	Ductal	III	Yes	IIIB	0	0	0	1	Yes	Dead/WD	1	1	2.01918	F
54	70	2	140	High	44	White	Ductal	III	Yes	IIIC	1	1	0	0	No	Dead/WD	1	1	11.3041	F
55	90	3	270	High	38	White	Ductal	III	No	IV	0	1	0	0	Yes	Dead/WD	1	1	1.16164	F
56	0	0	0	Low	58	White	Ductal	III	No	IIIB	1	0	1	0	Yes	Alive/NED	0	0	11.6219	F
57	80	2	160	High	65	White	Ductal	II	Yes	IIIB	1	1	0	0	Yes	Alive/NED	0	0	11.389	F
58	90	3	270	High	41	White	Ductal	III	Yes	IIIB	0	0	0	0	No	Dead/WD	1	1	0.416438	F
60	20	2	40	Low	69	White	Ductal	III	Yes	IV	0	0	1	0	No	Dead/WD	1	1	2.04658	F
61	90	1	90	Low	46	White	Ductal	II	No	IIIB	1	1	0	0	Yes	Alive/NED	0	0	9.56712	F
62	0	0	0	Low	63	White	Ductal	II	Yes	IIIB	0	0	1	0	Yes	Dead/NOS	1		9.14795	F
63	50	2	100	Low	41	Spanish,Hispanic	Ductal	II	Yes	IIIB	0	0	1	0	No	Alive/WD	0	0	6.25479	F
64	0	0	0	Low	67	White	Ductal	II	Unknown	IIIB	1	0	0	0	Yes	Alive/NED	0	0	11.0137	F
65	95	3	285	High	50	White	Ductal	III	Yes	IV	0	1	1	0	No	Dead/WD	1	1	0.287671	F
66	80	2	160	High	43	White	Ductal	III	Yes	IIIB	0	0	0	1	No	Dead/WD	1	1	0.928767	F
67	30	2	60	Low	47	White	Ductal	II	Yes	IIIB	1	1	1	0	Yes	Alive/NED	0	0	10.4685	F
69	0	0	0	Low	75	Black	Ductal	III	Yes	IIIB	0	0	1	0	No	Dead/WD	1	1	0.865753	F
72	80	2	160	High	39	White	others	I	Yes	IIIB	1	1	1	0	Yes	Alive/WD	0	0	10.2055	F
73	30	1	30	Low	23	White	Ductal	III	Yes	IIIB	1	1	0	0	No	Dead/WD	1	1	3.7863	F
74	30	2	60	Low	58	White	Ductal	III	Yes	IIIC	0	0	1	0	Yes	Dead/NOS	1		0.764384	F
75	50	1	50	Low	44	White	Ductal	III	Yes	IIIB	0	0	0	1	Yes	Alive/NED	0	0	9.83288	F
77	80	2	160	High	38	Spanish,Hispanic	others	III	Yes	IIIB	0	0	0	1	Yes	Dead/WD	1	1	1.33973	F
79	0	0	0	Low	32	White	Ductal	III	Yes	IIIB	0	0	1	0	Yes	Dead/WD	1	1	1.20822	F
80	80	3	240	High	45	Spanish,Hispanic	Ductal	III	Yes	IIIC	0	0	0	1	No	Dead/WD	1	1	5.11781	F
81	10	1	10	Low	50	White	Ductal	III	Yes	IIIB	0	0	1	0	Yes	Dead/WD	1	1	2.22466	F
82	95	2	190	High	51	Spanish,Hispanic	Ductal	III	Yes	IIIB	0	0	0	1	Yes	Dead/NOS	1		1.40274	F
83	0	0	0	Low	52	White	Ductal	III	Yes	IIIB	1	0	0	0	Yes	Dead/WD	1	1	4.56164	F
84	90	2	180	High	49	White	Ductal	III	Unknown	IIIC	1	1	0	0	Yes	Alive/NED	0	0	8.38356	F
85	30	2	60	Low	52	White	Ductal	III	Unknown	IIIB	0	0	1	0	No	Alive/NED	0	0	4.93973	F
86	70	3	210	High	75	White	Ductal	II	Yes	IIIC	0	1	0	0	Yes	Dead/WD	1	1	1.70411	F
87	85	2	170	High	23	White	Ductal	III	Yes	IV	1	1	0	0	Yes	Dead/WD	1	1	1.43288	F
88	0	0	0	Low	63	White	Ductal	III	Yes	IIIB	0	0	0	1	No	Dead/WD	1	1	0.287671	F
89	0	0	0	Low	42	White	Lobular	III	Yes	IIIB	0	0	1	0	Yes	Dead/WD	1	1	2.18082	F
90	80	1	80	Low	59	White	Ductal	III	Yes	IIIB	1	1	0	0	Yes	Dead/WD	1	1	1.24384	F
